# Supplementary material for: A diagnostic interface for the ICOsahedral Non-hydrostatic (ICON) modelling framework based on the Modular Earth Submodel System (MESSy, 2.50)
Source: Copernicus journal article supplement (doi:10.5194/gmd-2016-126), 2016-06-20
Supplement: Supplementary file 2 [file gmd-2016-126-supplement.zip]

Electronic supplement to Kern, B. and Jöckel, P.: “The Modular Earth Submodel System (MESSy, 2.50\_extended) as diagnostic interface of the ICOSahedral Non-hydrostatic (ICON) modelling framework”, Geosci. Model Dev. (2016).

Table S1: Model system runtime for the different testcases.

| nodes                    | cores | runtime (s) |                    |                  |                  |
|--------------------------|-------|-------------|--------------------|------------------|------------------|
|                          |       | ICON only   | MESSy<br>interface | MESSy<br>+ GRAGG | MESSy<br>+ VISOP |
| no output                |       |             |                    |                  |                  |
| 64                       | 1536  | 345.67      | 344.4              | 1218.66          | 397.22           |
| 128                      | 3072  | 181.79      | 181.95             | 1013.27          | 207.76           |
| 256                      | 6144  | 103.9       | 103.26             | 1016.06          | 116.57           |
| 512                      | 12288 | 64.74       | 64.76              | 1045.58          | 71.6             |
| ICON and submodel output |       |             |                    |                  |                  |
| 64                       | 1536  | 347.8       | 346.67             | 1364.41          | 403.94           |
| 128                      | 3072  | 188.91      | 186.25             | 1218.12          | 216.05           |
| 256                      | 6144  | 117.03      | 116.93             | 1164.59          | 131.08           |
| 512                      | 12288 | 96.41       | 95.84              | 1175.66          | 105.21           |

Table S2: Model system runtime for the different optimised testcases.

| nodes                    | cores | runtime (s)   |         |            |               |         |            |
|--------------------------|-------|---------------|---------|------------|---------------|---------|------------|
|                          |       | MESSy + GRAGG |         |            | MESSy + VISOP |         |            |
|                          |       | OMP           | reduced | red. + OMP | OMP           | reduced | red. + OMP |
| no output                |       |               |         |            |               |         |            |
| 64                       | 1536  | 1245.21       | 354.66  | 353.25     | 358.74        | 346.04  | 345.11     |
| 128                      | 3072  | 1115.34       | 189.68  | 190.11     | 189.39        | 182.52  | 182.02     |
| 256                      | 6144  | 1111.65       | 114.64  | 115.8      | 107.36        | 103.73  | 104.11     |
| 512                      | 12288 | 1112.69       | 77.28   | 77.08      | 66.24         | 68.95   | 65.27      |
| ICON and submodel output |       |               |         |            |               |         |            |
| 64                       | 1536  | 1418.53       | 420.95  | 420.36     | 364.34        | 350.92  | 350.04     |
| 128                      | 3072  | 1309.98       | 269.21  | 260.22     | 196.57        | 190.5   | 188.88     |
| 256                      | 6144  | 1237.61       | 186.79  | 181.93     | 122.34        | 119.8   | 119.15     |
| 512                      | 12288 | 1261.62       | 157.71  | 155.02     | 100.38        | 99.72   | 99.08      |

Table S3: Calculated speedup for the different testcases.

| nodes                    | cores | ICON only | MESSy<br>interface | MESSy<br>+ GRAGG | MESSy<br>+ VISOP | optimal<br>speedup |
|--------------------------|-------|-----------|--------------------|------------------|------------------|--------------------|
| no output                |       |           |                    |                  |                  |                    |
| 64                       | 1536  | 1         | 1                  | 1                | 1                | 1                  |
| 128                      | 3072  | 1.9       | 1.89               | 1.2              | 1.91             | 2                  |
| 256                      | 6144  | 3.33      | 3.34               | 1.2              | 3.41             | 4                  |
| 512                      | 12288 | 5.34      | 5.32               | 1.17             | 5.55             | 8                  |
| ICON and submodel output |       |           |                    |                  |                  |                    |
| 64                       | 1536  | 1         | 1                  | 1                | 1                | 1                  |
| 128                      | 3072  | 1.84      | 1.86               | 1.12             | 1.87             | 2                  |
| 256                      | 6144  | 2.97      | 2.96               | 1.17             | 3.08             | 4                  |
| 512                      | 12288 | 3.6       | 3.62               | 1.16             | 3.84             | 8                  |

Table S4: Calculated speedup for the different optimised testcases.

| nodes                    | cores | MESSy + GRAGG |         |            | MESSy + VISOP |         |            | optimal |
|--------------------------|-------|---------------|---------|------------|---------------|---------|------------|---------|
|                          |       | OMP           | reduced | red. + OMP | OMP           | reduced | red. + OMP |         |
| no output                |       |               |         |            |               |         |            |         |
| 64                       | 1536  | 1             | 1       | 1          | 1             | 1       | 1          | 1       |
| 128                      | 3072  | 1.12          | 1.87    | 1.86       | 1.89          | 1.9     | 1.9        | 2       |
| 256                      | 6144  | 1.12          | 3.09    | 3.05       | 3.34          | 3.34    | 3.32       | 4       |
| 512                      | 12288 | 1.12          | 4.59    | 4.58       | 5.42          | 5.02    | 5.29       | 8       |
| ICON and submodel output |       |               |         |            |               |         |            |         |
| 64                       | 1536  | 1             | 1       | 1          | 1             | 1       | 1          | 1       |
| 128                      | 3072  | 1.08          | 1.56    | 1.62       | 1.85          | 1.84    | 1.85       | 2       |
| 256                      | 6144  | 1.15          | 2.25    | 2.31       | 2.98          | 2.93    | 2.94       | 4       |
| 512                      | 12288 | 1.12          | 2.67    | 2.71       | 3.63          | 3.52    | 3.53       | 8       |
